# Supplementary material
Source: publisher figshare collection journal article supplement (https://tandf.figshare.com/articles/dataset/_/21286786)

**Supplementary Material**

*Linear mixed-effects modelling for the effect of the circadian rhythm on cfDNA concentration and methylation levels of CDO1*, *SOX17,* and *TAC1*

Models were fitted by backward stepwise elimination (*p* ≥ 0.05 for removal) to select fixed and random parts of the linear mixed model using the ‘lmerTest’ package in R. Final models are displayed below.

*Testing model assumptions*

The assumptions of linearity, normality of the residuals and random effects, and homoscedasticity (*i.e.* constant variance of the residuals) were checked visually. A series of diagnostic plots were computed using the ‘sjPlot’ package to check these assumptions.

#1 – cfDNA concentration


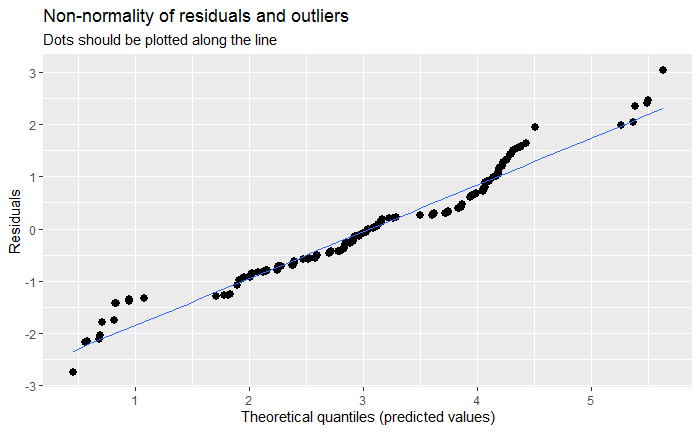

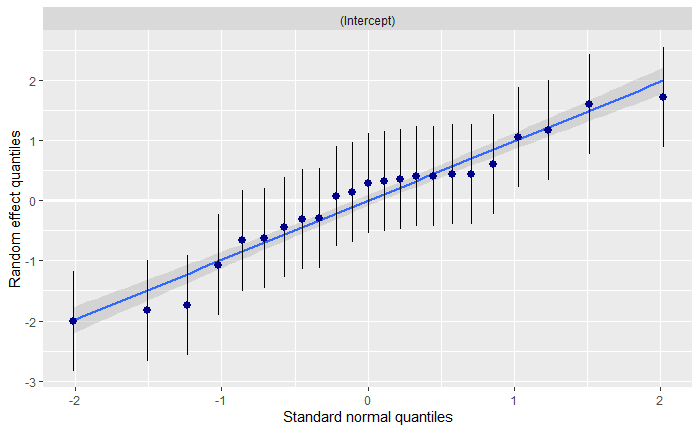

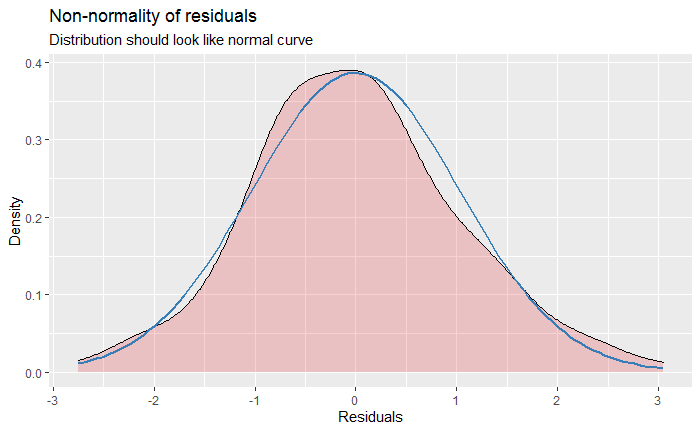

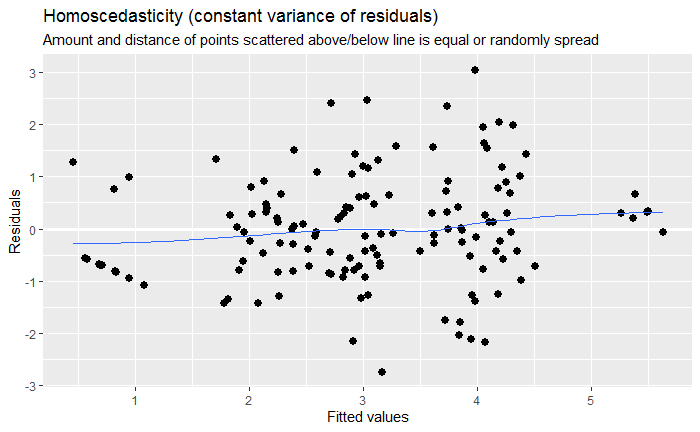


#2 – *CDO1* methylation level


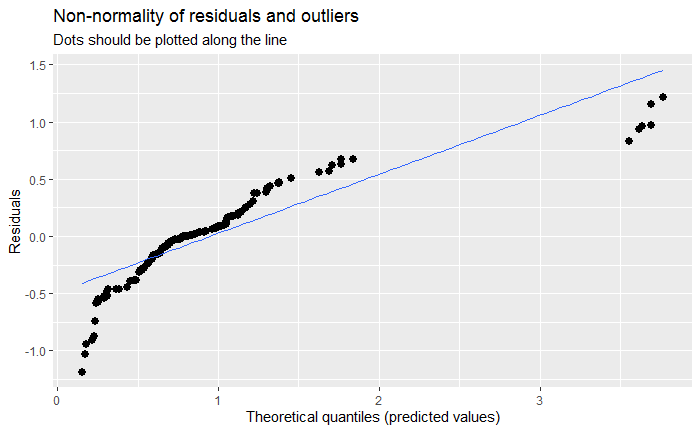

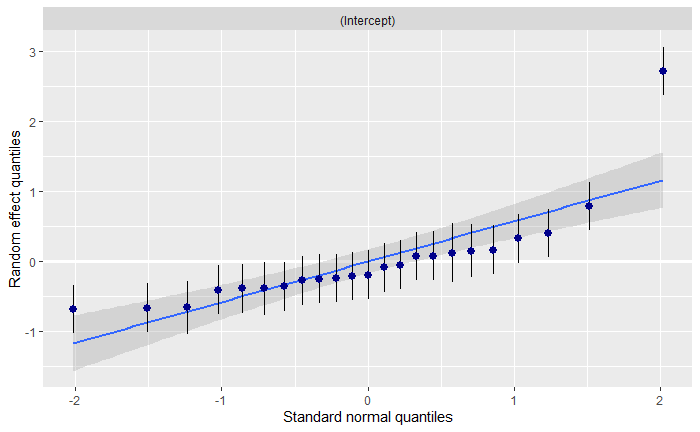

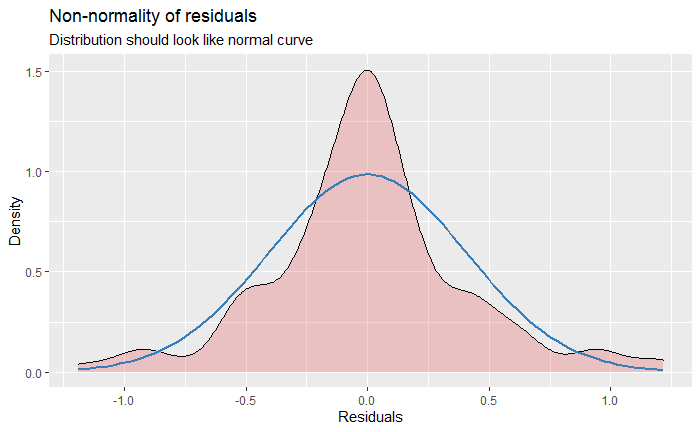

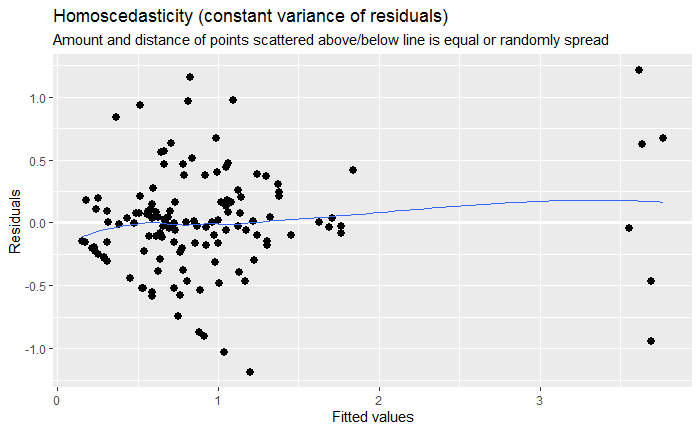


#3 – *SOX17* methylation level


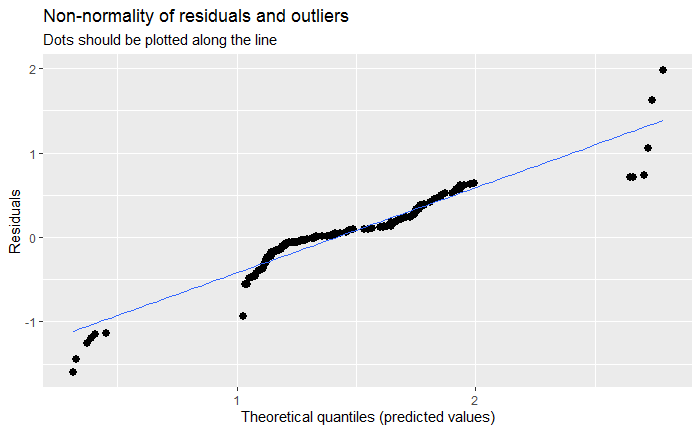

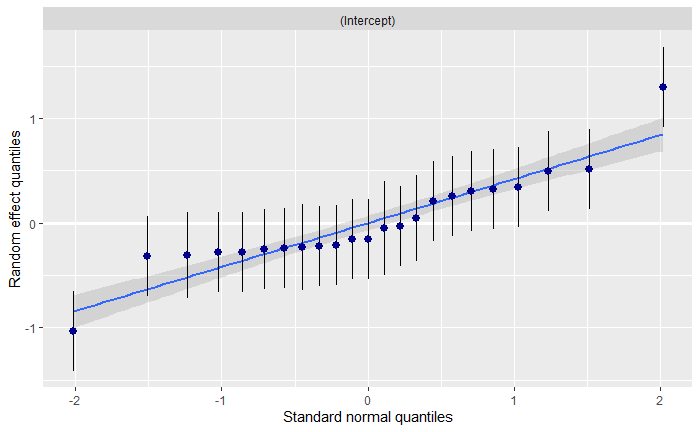

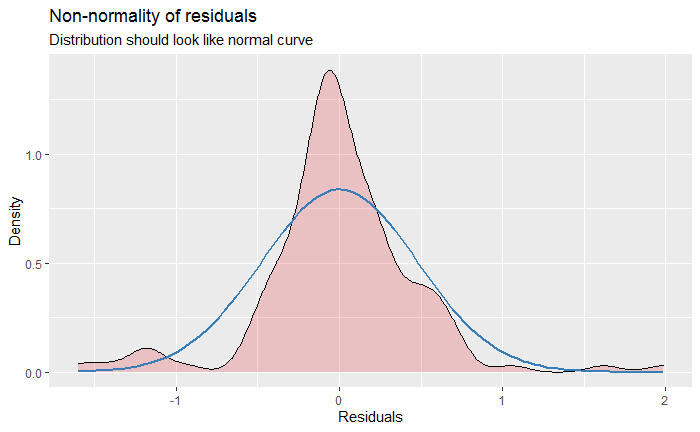

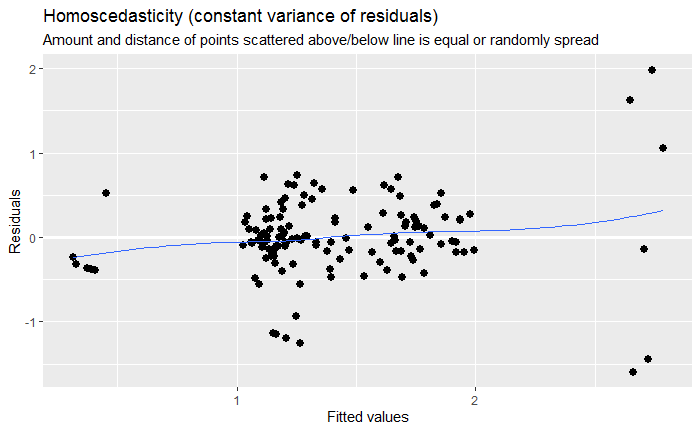


#4 – *TAC1* methylation level


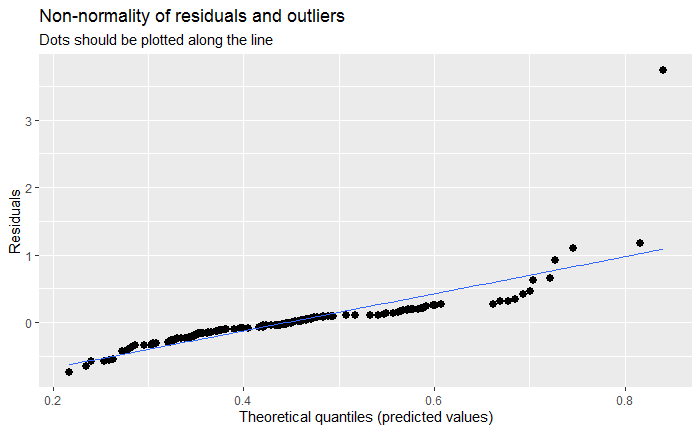

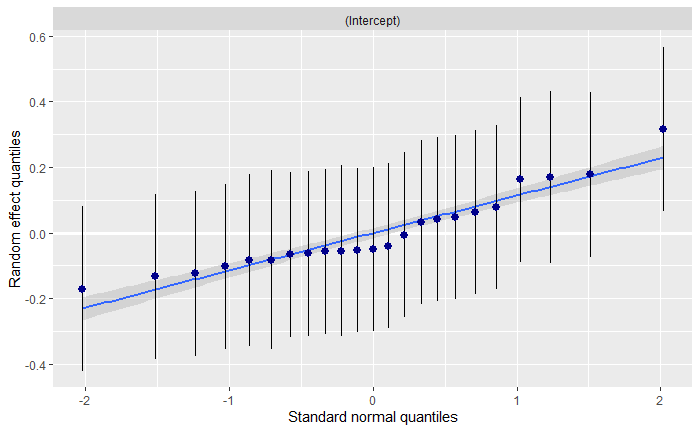

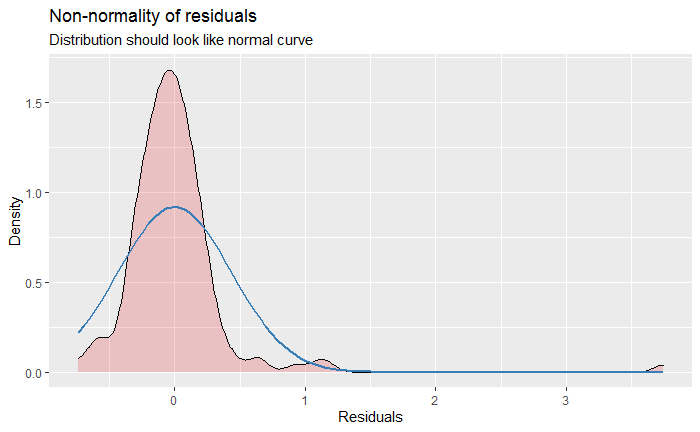

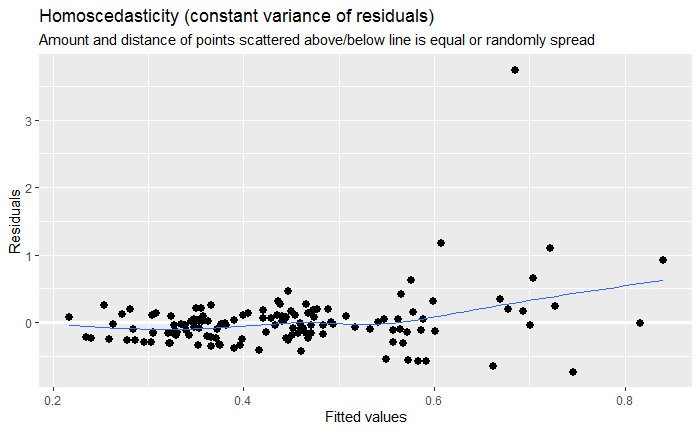


*Linear mixed-effects modelling to compare the methylation levels of CDO1*, *SOX17,* and *TAC1* *in cases vs. controls and explore the additional value of collecting multiple urine samples*

Models were fitted by backward stepwise elimination (*p* ≥ 0.05 for removal) to select fixed and random parts of the linear mixed model using the ‘lmerTest’ package in R. Final models are displayed below.

*Testing model assumptions*

The assumptions of linearity, normality of the residuals and random effects, and homoscedasticity (*i.e.* constant variance of the residuals) were checked visually. A series of diagnostic plots were computed using the ‘sjPlot’ package to check these assumptions.

#5 – *CDO1* methylation levels in cases vs. controls


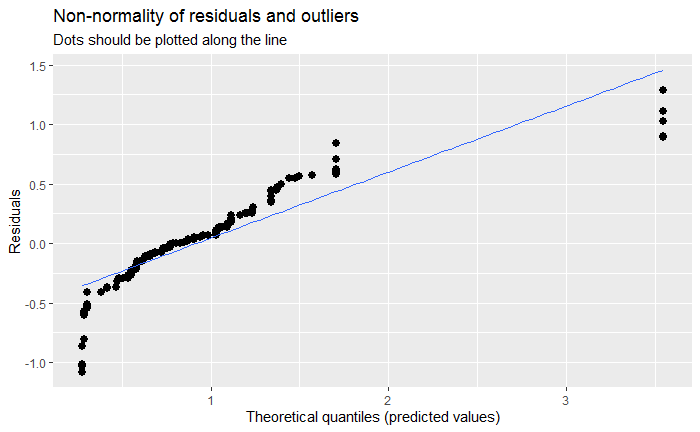

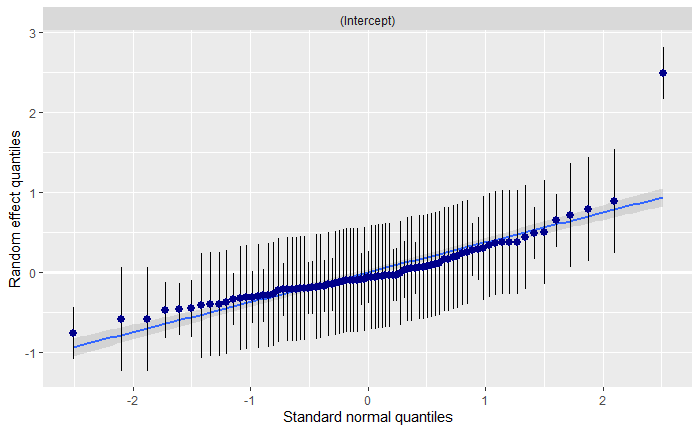

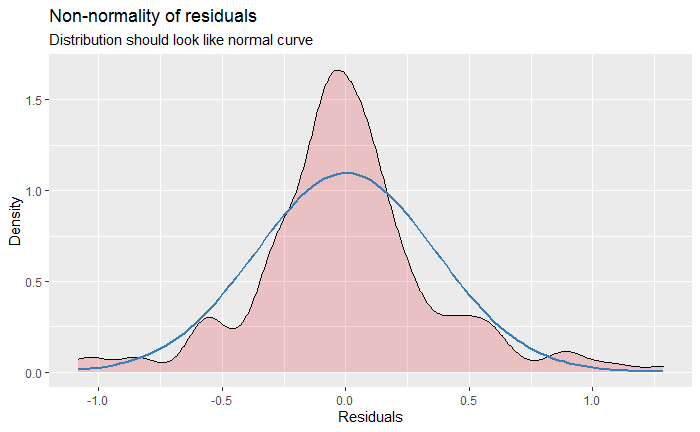

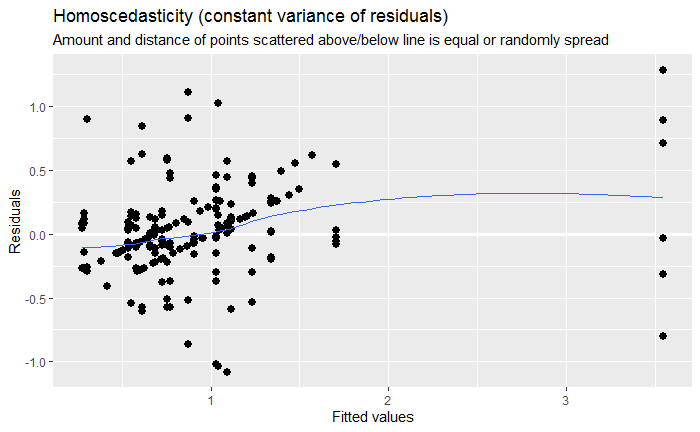


#6 – *SOX17* methylation levels in cases vs. controls


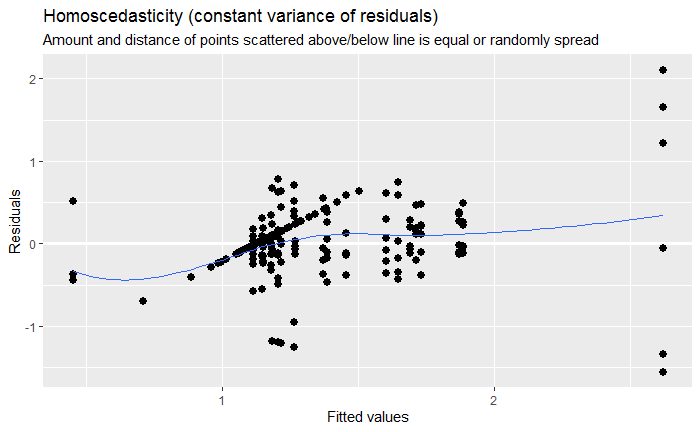

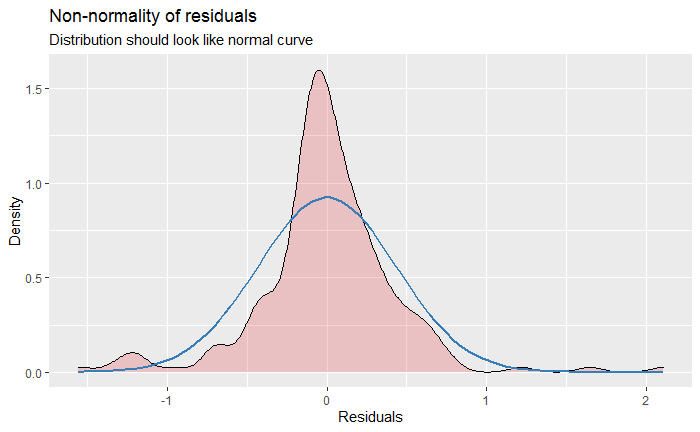

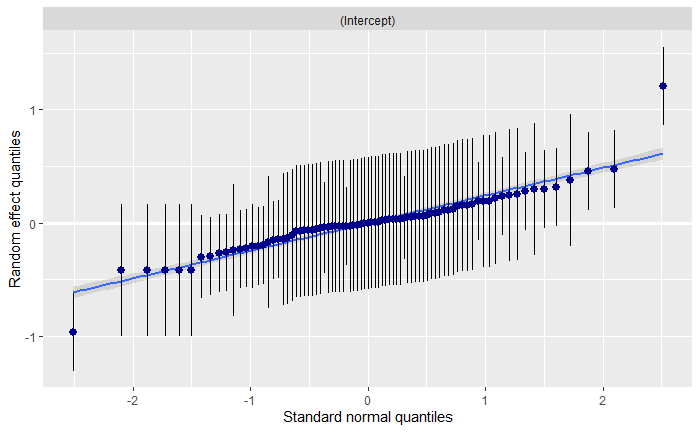

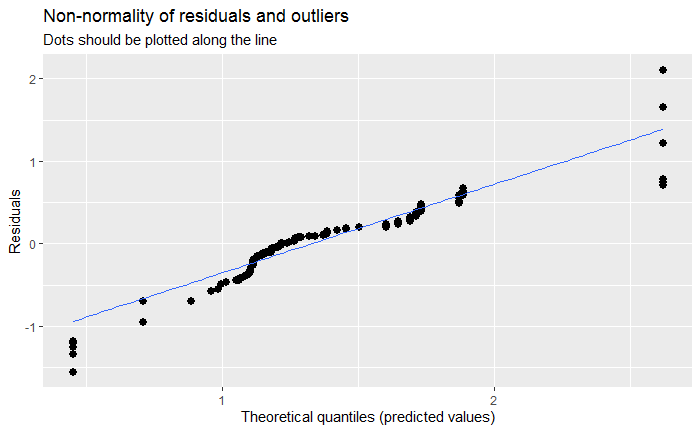


#7 – *TAC1* methylation levels in cases vs. controls


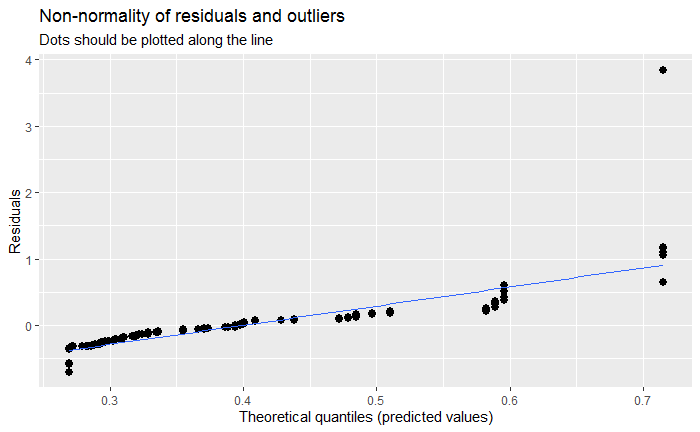

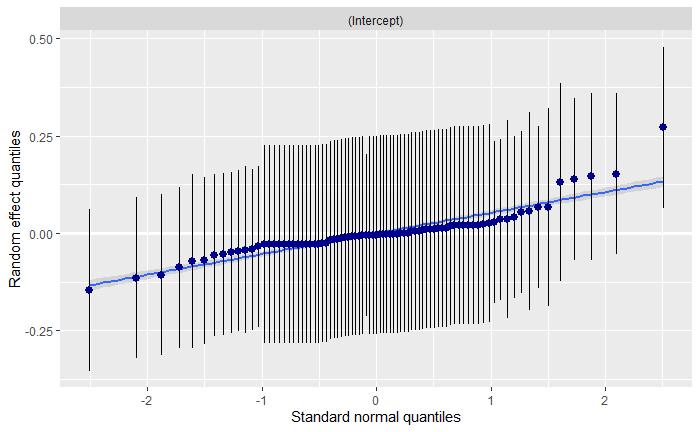

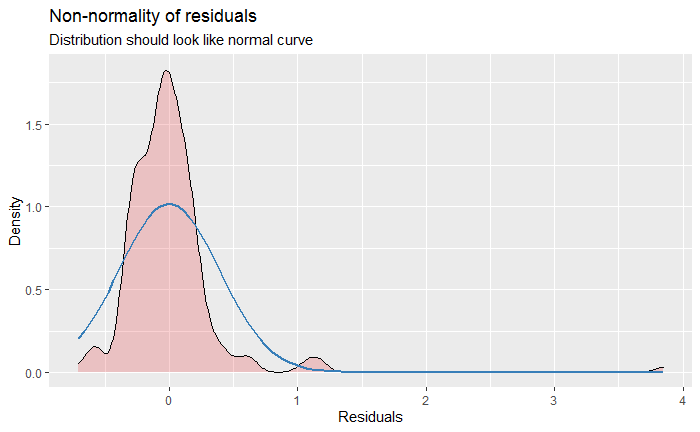

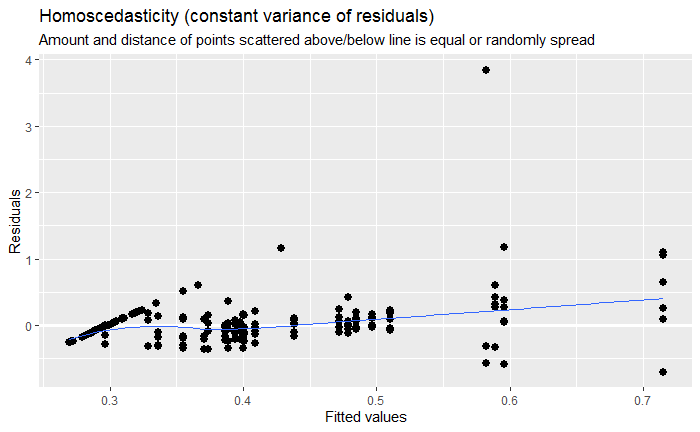

Supplement: Supplementary file 1 [file 1]
