# Supplementary material
Source: publisher figshare collection journal article supplement (https://tandf.figshare.com/articles/dataset/_/21286786)
Supplement: Supplementary file 1 [file 1]

## **Supplementary Data File**

*Dynamics of methylated cell-free DNA in the urine of non-small cell lung cancer patients*

Ct values of *ACTB*, *CDO1*, *SOX17*, and *TAC1*. For data analysis and data visualization, Ct values of each marker are normalised to the reference gene *ACTB* and presented as square root Ct ratios.

\*Case values in Figure 5 represent the mean methylation level measured in the six collected urine samples.

| Cases | ACTB Ct      | CDO1 Ct      | TAC1 Ct      | SOX17 Ct     |          |
|-------|--------------|--------------|--------------|--------------|----------|
| A     | 25,6         | 32,0         | 37,5         | 31,8         |          |
| A     | 28,8         | Undetermined | Undetermined | 35,4         |          |
| A     | 32,9         | Undetermined | Undetermined | Undetermined | excluded |
| A     | 24,3         | 28,9         | 35,6         | 29,1         |          |
| A     | Undetermined | Undetermined | 37,0         | Undetermined | excluded |
| A     | 26,4         | 32,6         | 35,3         | 32,3         |          |
| B     | 26,1         | 31,2         | 34,8         | 30,9         |          |
| B     | 24,8         | 30,0         | 31,7         | 29,5         |          |
| B     | 24,0         | 30,3         | 32,4         | 29,1         |          |
| B     | 25,9         | 31,1         | 35,5         | 30,7         |          |
| B     | 23,0         | 30,7         | 32,1         | 28,2         |          |
| B     | 23,8         | 30,6         | 32,7         | 29,1         |          |
| B     | 26,9         | 33,0         | 35,5         | 33,6         |          |
| C     | 28,7         | 44,7         | 38,0         | Undetermined |          |
| C     | 28,2         | Undetermined | Undetermined | Undetermined |          |
| C     | 28,8         | Undetermined | Undetermined | Undetermined |          |
| C     | 29,9         | Undetermined | Undetermined | Undetermined |          |
| C     | 29,5         | Undetermined | Undetermined | 43,6         |          |
| D     | 23,2         | 30,5         | 31,3         | 27,5         |          |
| D     | 23,6         | 31,3         | 31,2         | 28,0         |          |
| D     | 23,6         | 31,8         | 32,6         | 28,6         |          |
| D     | 24,2         | 31,8         | 32,7         | 29,1         |          |
| D     | 23,8         | 31,3         | 33,3         | 28,8         |          |
| D     | 24,5         | 32,9         | 33,5         | 28,8         |          |
| E     | 27,4         | 33,1         | 38,9         | 33,7         |          |
| E     | 28,0         | 33,7         | Undetermined | 34,6         |          |
| E     | 26,7         | 33,4         | 41,9         | 32,7         |          |
| E     | 25,9         | 31,4         | 34,9         | 31,5         |          |
| E     | 28,8         | Undetermined | 40,7         | 37,0         |          |
| E     | 27,2         | 34,2         | 36,0         | 33,9         |          |
| F     | 28,1         | Undetermined | 38,6         | 34,6         |          |
| F     | 23,7         | 29,1         | 29,9         | 28,3         |          |
| F     | 26,4         | 32,8         | 33,0         | 32,3         |          |
| F     | 32,5         | Undetermined | 35,4         | Undetermined | excluded |
| F     | 25,2         | 30,4         | 32,2         | 30,6         |          |
| F     | 24,5         | 30,7         | 31,6         | 30,3         |          |
| G     | 23,8         | 32,1         | 32,2         | 28,7         |          |
| G     | 24,1         | 32,4         | 32,4         | 28,9         |          |
| G     | 22,9         | 30,2         | 31,0         | 27,7         |          |
| G     | 23,5         | 31,3         | 32,4         | 28,9         |          |
| G     | 24,1         | 32,0         | 31,9         | 28,5         |          |
| G     | 23,4         | 31,2         | 32,5         | 28,9         |          |
| H     | 25,8         | 31,8         | 35,8         | 31,4         |          |
| H     | 25,9         | 31,9         | 35,3         | 31,1         |          |
| H     | 26,2         | 32,0         | 37,7         | 33,1         |          |
| H     | 25,8         | 31,9         | 34,8         | 31,9         |          |
| H     | 25,0         | 33,5         | 34,7         | 30,9         |          |
| H     | 24,4         | 30,6         | 34,4         | 29,4         |          |
| I     | 23,3         | 31,0         | 31,3         | 29,7         |          |
| I     | 23,2         | 34,5         | 31,3         | 30,0         |          |
| I     | 23,1         | 32,3         | 31,1         | 30,0         |          |
| I     | 23,9         | 29,9         | 31,8         | 29,7         |          |
| I     | 23,9         | 30,0         | 32,6         | 30,2         |          |
| I     | 23,1         | 30,9         | 31,9         | 29,8         |          |
| J     | 24,0         | 30,1         | 33,3         | 28,7         |          |
| J     | 31,0         | Undetermined | Undetermined | Undetermined |          |
| J     | 26,8         | Undetermined | Undetermined | 34,1         |          |
| J     | 25,4         | 41,7         | 35,7         | 31,8         |          |

|   |      |              |              |              |          |
|---|------|--------------|--------------|--------------|----------|
| J | 32,8 | Undetermined | Undetermined | Undetermined | excluded |
| J | 24,2 | 29,7         | 32,6         | 29,1         |          |
| K | 26,6 | 30,9         | 34,1         | 31,0         |          |
| K | 24,8 | 29,9         | 33,8         | 30,6         |          |
| K | 23,3 | 28,4         | 30,9         | 28,5         |          |
| K | 23,2 | 28,3         | 31,0         | 28,0         |          |
| K | 23,7 | 28,9         | 31,8         | 28,6         |          |
| K | 23,9 | 29,1         | 32,8         | 28,6         |          |
| L | 26,0 | 33,5         | 35,1         | 31,4         |          |
| L | 26,0 | 32,6         | 38,0         | 30,3         |          |
| L | 25,9 | 32,0         | 33,4         | 32,0         |          |
| L | 25,2 | 31,2         | 35,0         | 30,0         |          |
| L | 25,5 | 31,4         | 37,7         | 31,2         |          |
| L | 25,4 | 33,3         | 41,4         | 30,6         |          |
| M | 23,2 | 32,7         | 33,0         | 28,8         |          |
| M | 24,9 | 33,9         | 33,5         | 31,0         |          |
| M | 22,9 | 32,2         | 31,7         | 27,0         |          |
| M | 24,6 | 36,7         | 33,0         | 29,7         |          |
| M | 26,2 | 44,4         | 36,6         | 30,6         |          |
| M | 25,5 | Undetermined | 34,5         | 31,4         |          |
| N | 23,5 | 30,7         | 34,4         | 30,0         |          |
| N | 25,4 | 32,5         | 34,2         | 32,4         |          |
| N | 24,7 | 32,1         | 41,2         | 31,3         |          |
| N | 23,5 | 30,5         | 42,1         | 30,1         |          |
| N | 23,5 | 29,7         | 35,6         | 29,4         |          |
| N | 24,6 | 31,6         | 36,7         | 31,4         |          |
| O | 23,9 | 30,2         | 30,6         | 29,1         |          |
| O | 29,3 | Undetermined | Undetermined | 35,4         |          |
| O | 24,3 | 32,3         | 31,3         | 29,2         |          |
| O | 24,0 | 31,8         | 32,0         | 30,0         |          |
| O | 28,2 | Undetermined | 33,2         | Undetermined |          |
| O | 26,6 | 34,2         | 34,5         | 33,3         |          |
| P | 22,0 | 31,7         | 33,9         | 29,6         |          |
| P | 23,3 | 31,1         | 34,3         | 29,1         |          |
| P | 23,2 | 30,1         | 32,6         | 29,6         |          |
| P | 23,8 | 31,7         | 33,5         | 29,8         |          |
| P | 23,4 | 30,5         | 32,9         | 29,2         |          |
| P | 23,1 | 31,1         | 33,2         | 29,5         |          |
| Q | 23,7 | 29,5         | 33,9         | 28,6         |          |
| Q | 26,1 | 31,9         | Undetermined | 32,1         |          |
| Q | 26,1 | 34,6         | 38,4         | 31,7         |          |
| Q | 28,4 | 40,0         | Undetermined | Undetermined |          |
| Q | 27,4 | 38,2         | Undetermined | 33,9         |          |
| Q | 25,9 | 33,7         | Undetermined | 32,2         |          |
| R | 32,2 | Undetermined | Undetermined | Undetermined | excluded |
| R | 27,6 | Undetermined | 35,9         | 33,9         |          |
| R | 23,4 | 33,4         | 34,6         | 30,0         |          |
| R | 28,2 | Undetermined | 36,5         | 36,6         |          |
| R | 23,1 | 32,7         | 38,5         | 29,4         |          |
| R | 22,9 | 32,6         | 33,7         | 29,0         |          |
| S | 23,0 | 32,7         | 33,3         | 29,8         |          |
| S | 24,2 | 32,4         | 32,2         | 29,6         |          |
| S | 24,7 | 33,6         | 34,2         | 30,8         |          |
| S | 24,6 | 32,6         | 36,9         | 31,7         |          |
| S | 20,3 | 29,2         | 29,5         | 26,6         |          |
| S | 23,3 | 31,6         | 33,3         | 29,8         |          |
| T | 23,2 | 25,5         | 29,0         | 26,0         |          |
| T | 22,7 | 25,2         | 27,6         | 24,9         |          |
| T | 29,1 | 32,3         | 36,4         | 35,0         |          |

|   |      |              |              |              |
|---|------|--------------|--------------|--------------|
| T | 23,5 | 27,2         | 30,2         | 27,4         |
| T | 28,2 | 31,2         | Undetermined | 34,7         |
| T | 23,2 | 25,3         | 28,2         | 25,6         |
| U | 24,9 | 32,4         | 36,4         | 30,9         |
| U | 23,4 | 31,4         | 32,6         | 29,2         |
| U | 23,3 | 31,0         | 32,1         | 29,3         |
| U | 22,8 | 31,4         | 33,2         | 28,8         |
| U | 23,0 | 31,8         | 33,3         | 29,3         |
| U | 22,9 | 32,8         | 32,9         | 29,0         |
| V | 23,3 | 29,1         | 33,4         | 28,2         |
| V | 23,7 | 29,5         | 33,3         | 28,7         |
| V | 23,7 | 29,0         | 34,2         | 28,2         |
| V | 23,6 | 28,8         | 35,5         | 28,4         |
| V | 23,9 | 30,2         | 33,4         | 28,4         |
| V | 24,0 | 30,2         | 32,3         | 28,1         |
| W | 30,2 | 36,9         | Undetermined | 34,9         |
| W | 27,0 | 31,7         | 37,5         | 32,0         |
| W | 31,8 | 41,5         | Undetermined | Undetermined |
| W | 29,8 | Undetermined | Undetermined | 39,8         |
| W | 28,7 | Undetermined | Undetermined | 33,9         |
| W | 26,7 | 31,7         | 29,1         | 32,0         |

| Controls | ACTB Ct | CDO1 Ct      | TAC1 Ct      | SOX17 Ct     |
|----------|---------|--------------|--------------|--------------|
| 1        | 27,0    | 31,6         | 33,7         | 36,2         |
| 2        | 23,7    | 33,5         | 30,4         | 36,8         |
| 3        | 24,2    | 33,0         | 31,0         | 34,7         |
| 4        | 24,3    | 30,1         | 30,2         | 35,0         |
| 5        | 24,8    | 31,9         | 32,2         | 34,0         |
| 6        | 24,9    | 29,7         | 30,2         | 34,5         |
| 7        | 27,6    | 37,6         | 33,7         | 38,2         |
| 8        | 24,6    | 31,1         | 30,4         | 35,2         |
| 9        | 25,0    | 30,8         | 30,9         | 32,8         |
| 10       | 24,1    | 34,0         | 30,7         | 34,6         |
| 11       | 24,8    | 32,4         | 30,4         | 35,3         |
| 12       | 30,8    | 41,0         | Undetermined | 36,1         |
| 13       | 25,9    | 34,5         | 32,1         | 38,0         |
| 14       | 30,4    | Undetermined | Undetermined | Undetermined |
| 15       | 26,6    | 34,0         | 35,3         | 36,7         |
| 16       | 22,3    | 29,8         | 27,8         | 30,8         |
| 17       | 27,4    | 32,6         | 34,5         | Undetermined |
| 18       | 24,4    | 33,8         | 30,3         | 34,7         |
| 19       | 23,4    | 33,0         | 30,0         | 41,6         |
| 20       | 26,3    | 33,6         | 31,5         | 34,9         |
| 21       | 23,5    | 30,4         | 29,8         | 34,8         |
| 22       | 23,6    | 31,6         | 29,5         | 32,8         |
| 23       | 25,8    | 33,8         | 32,0         | Undetermined |
| 24       | 25,8    | 34,0         | 32,0         | 34,9         |
| 25       | 23,3    | 32,1         | 28,9         | Undetermined |
| 26       | 24,7    | 32,9         | 31,5         | 42,3         |
| 27       | 30,7    | Undetermined | Undetermined | Undetermined |
| 28       | 28,0    | 37,8         | 34,3         | Undetermined |
| 29       | 24,9    | 32,1         | 29,8         | 35,6         |
| 30       | 25,9    | 37,6         | 31,0         | 36,5         |
| 31       | 24,3    | 30,5         | 30,4         | 32,9         |
| 32       | 24,2    | 30,5         | 30,7         | 40,7         |
| 33       | 31,8    | Undetermined | Undetermined | Undetermined |
| 34       | 28,5    | 37,4         | Undetermined | Undetermined |
| 35       | 26,6    | 32,8         | 32,0         | 35,2         |
| 36       | 24,2    | 33,4         | 29,0         | 32,9         |
| 37       | 23,9    | 30,9         | 29,1         | 30,6         |
| 38       | 26,7    | 35,3         | 33,0         | 39,1         |
| 39       | 26,3    | 31,5         | 33,2         | 35,9         |
| 40       | 24,7    | 33,1         | 32,5         | Undetermined |
| 41       | 24,2    | 31,0         | 30,4         | 40,3         |
| 42       | 24,8    | 31,2         | 31,7         | 33,5         |
| 43       | 23,5    | 29,5         | 28,5         | 32,3         |
| 44       | 26,2    | 31,5         | 33,0         | 35,4         |
| 45       | 24,7    | 31,0         | 31,2         | 34,5         |
| 46       | 23,4    | 28,6         | 28,8         | 34,3         |
| 47       | 24,2    | 30,9         | 28,6         | 31,2         |
| 48       | 26,0    | 31,8         | 31,9         | 37,1         |
| 49       | 27,1    | 32,1         | 33,2         | Undetermined |

|    |      |      |      |              |
|----|------|------|------|--------------|
| 50 | 23,5 | 31,5 | 29,4 | 31,8         |
| 51 | 26,3 | 30,6 | 32,4 | Undetermined |
| 52 | 23,3 | 31,8 | 29,0 | 32,0         |
| 53 | 23,6 | 33,6 | 29,7 | 34,5         |
| 54 | 24,0 | 29,7 | 30,5 | 35,7         |
| 55 | 22,8 | 30,6 | 29,3 | 34,3         |
| 56 | 23,6 | 33,3 | 30,2 | 34,2         |
| 57 | 23,8 | 32,4 | 29,5 | 32,9         |
| 58 | 24,1 | 31,2 | 31,6 | 34,2         |
| 59 | 26,3 | 31,2 | 32,8 | 36,0         |
| 60 | 23,5 | 31,9 | 29,0 | 33,5         |
